# Supplementary material
Source: Springer Nature journal article supplement (https://www.springermedizin.de/resource/supplementary/12958_2010_771_MOESM3_ESM.pdf/9568460)

Primary tumor (T5)

1<sup>st</sup> Transplant

3<sup>rd</sup> Transplant

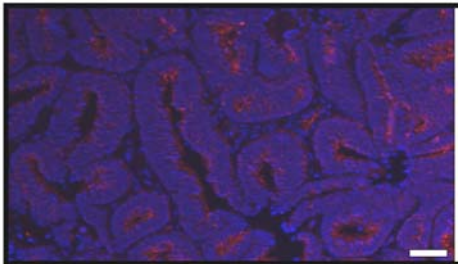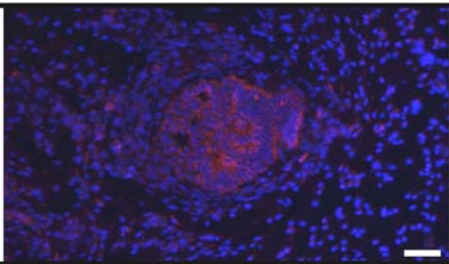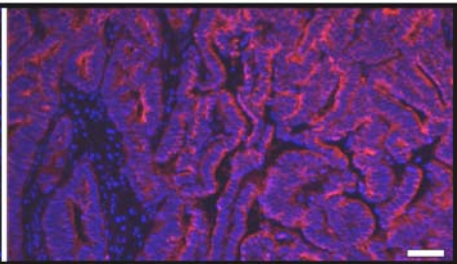

Supplement: MOESM3 [file 9568460]
